# Supplementary material
Source: PubMed Central journal article supplement (PMC9989498)
Supplement: sj-pdf-1-ajl-10.1177_15598276221112309.pdf [file sj-pdf-1-ajl-10.1177_15598276221112309.pdf]

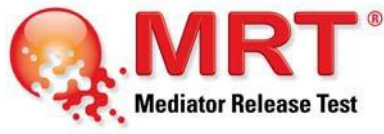

| Test Reaction Levels |                     |          |  |
|----------------------|---------------------|----------|--|
| Non-Reactive         | Moderately Reactive | Reactive |  |
|                      |                     |          |  |
| Vegetables           |                     |          |  |
|                      | Reaction Level      |          |  |
| STRING BEAN          |                     |          |  |
| SWEET POTATO         |                     |          |  |
| PUMPKIN              |                     |          |  |
| BROCCOLI             |                     |          |  |
| CUCUMBER             |                     |          |  |
| LETTUCE              |                     |          |  |
| CABBAGE              |                     |          |  |
| BEET                 |                     |          |  |
| ZUCCHINI             |                     |          |  |
| YELLOW SQUASH        |                     |          |  |
| ONION                |                     |          |  |
| ASPARAGUS            |                     |          |  |
| CAULIFLOWER          |                     |          |  |
| CELERY               |                     |          |  |
| CARROT               |                     |          |  |
| GREEN PEPPER         |                     |          |  |
| TOMATO               |                     |          |  |
| EGGPLANT             |                     |          |  |
| WHITE POTATO         |                     |          |  |
| SPINACH              |                     |          |  |
| MUSHROOM             |                     |          |  |
| Grains               |                     |          |  |
|                      | Reaction Level      |          |  |
| BUCKWHEAT            |                     |          |  |
| KAMUT                |                     |          |  |
| SPELT                |                     |          |  |
| CORN                 |                     |          |  |
| OAT                  |                     |          |  |
| MILLET               |                     |          |  |
| RICE                 |                     |          |  |
| QUINOA               |                     |          |  |
| WHEAT                |                     |          |  |
| AMARANTH (GRAIN)     |                     |          |  |
| RYE                  |                     |          |  |
| BARLEY               |                     |          |  |
| Chemicals            |                     |          |  |
|                      | Reaction Level      |          |  |
| POTASSIUM NITRATE    |                     |          |  |
| PHENYLETHYLAMINE     |                     |          |  |
| SALICYLIC ACID       |                     |          |  |
| CAFFEINE             |                     |          |  |
| SORBIC ACID          |                     |          |  |
| LECITHIN             |                     |          |  |
| FD&C RED #3          |                     |          |  |
| SACCHARINE           |                     |          |  |
| MSG                  |                     |          |  |
| SODIUM METABISULFITE |                     |          |  |
| IBUPROPHEN           |                     |          |  |
| POLYSORBATE 80       |                     |          |  |
| SOLANINE             |                     |          |  |
| TYRAMINE             |                     |          |  |
| SODIUM SULFITE       |                     |          |  |
| ACETAMINOPHEN        |                     |          |  |
| FD&C GREEN #3        |                     |          |  |
| FD&C YELLOW #5       |                     |          |  |
| FD&C YELLOW #6       |                     |          |  |
| ASPARTAME            |                     |          |  |
| FRUCTOSE             |                     |          |  |
| BENZOIC ACID         |                     |          |  |
| CANDIDA ALBICANS     |                     |          |  |
| POTASSIUM NITRITE    |                     |          |  |
| FD&C RED #40         |                     |          |  |
| FD&C BLUE #1         |                     |          |  |
| FD&C BLUE #2         |                     |          |  |

| Fruits           |                |  |  |
|------------------|----------------|--|--|
|                  | Reaction Level |  |  |
| GRAPE            |                |  |  |
| OLIVE            |                |  |  |
| ORANGE           |                |  |  |
| AVOCADO          |                |  |  |
| STRAWBERRY       |                |  |  |
| PLUM             |                |  |  |
| PEAR             |                |  |  |
| CHERRY           |                |  |  |
| HONEYDEW MELON   |                |  |  |
| WATERMELON       |                |  |  |
| BANANA           |                |  |  |
| PEACH            |                |  |  |
| MANGO            |                |  |  |
| CANTALOUPE       |                |  |  |
| PAPAYA           |                |  |  |
| CRANBERRY        |                |  |  |
| RASPBERRY        |                |  |  |
| PINEAPPLE        |                |  |  |
| APPLE            |                |  |  |
| APRICOT          |                |  |  |
| BLUEBERRY        |                |  |  |
| GRAPEFRUIT       |                |  |  |
| Meats & Poultry  |                |  |  |
|                  | Reaction Level |  |  |
| DUCK MEAT        |                |  |  |
| EGG              |                |  |  |
| LAMB             |                |  |  |
| BEEF             |                |  |  |
| TURKEY           |                |  |  |
| CHICKEN          |                |  |  |
| PORK             |                |  |  |
| Seafood          |                |  |  |
|                  | Reaction Level |  |  |
| RED SNAPPER      |                |  |  |
| SOLE             |                |  |  |
| SCALLOP          |                |  |  |
| TUNA             |                |  |  |
| SALMON           |                |  |  |
| SHRIMP           |                |  |  |
| TROUT            |                |  |  |
| CLAM             |                |  |  |
| CRAB             |                |  |  |
| CODFISH          |                |  |  |
| Flavor Enhancers |                |  |  |
|                  | Reaction Level |  |  |
| BLACK PEPPER     |                |  |  |
| GINGER           |                |  |  |
| LEEK             |                |  |  |
| VANILLA          |                |  |  |
| COCOA            |                |  |  |
| CINNAMON         |                |  |  |
| NUTMEG           |                |  |  |
| CANE SUGAR       |                |  |  |
| HONEY            |                |  |  |
| COCONUT          |                |  |  |
| DILL             |                |  |  |
| CAYENNE PEPPER   |                |  |  |
| MINT             |                |  |  |
| PAPRIKA          |                |  |  |
| TURMERIC         |                |  |  |
| PARSLEY          |                |  |  |
| LEMON            |                |  |  |
| OREGANO          |                |  |  |
| POPPY SEED       |                |  |  |
| SESAME           |                |  |  |
| BASIL            |                |  |  |
| MUSTARD          |                |  |  |
| GARLIC           |                |  |  |
| CUMIN            |                |  |  |
| BAY LEAF         |                |  |  |

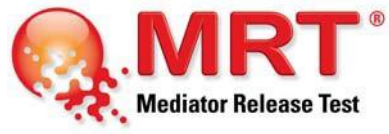

| Beans/Nuts/Legumes | Reaction Level    |
|--------------------|-------------------|
| LENTIL             | Low (Green)       |
| ALMOND             | Low (Green)       |
| SUNFLOWER SEED     | Low (Green)       |
| HAZELNUT           | Low-Mid (Green)   |
| PECAN              | Low-Mid (Green)   |
| GREEN PEA          | Low-Mid (Green)   |
| SOYBEAN            | Mid (Green)       |
| PISTACHIO          | Mid (Green)       |
| WALNUT             | Mid (Green)       |
| GARBANZO BEAN      | Mid (Green)       |
| CASHEW             | Mid (Green)       |
| PINTO BEAN         | Mid-High (Yellow) |
| LIMA BEAN          | High (Yellow)     |
| PEANUT             | High (Yellow)     |

| Dairy           | Reaction Level    |
|-----------------|-------------------|
| SWISS CHEESE    | Low (Green)       |
| BLUE CHEESE     | Low (Green)       |
| AMERICAN CHEESE | Low-Mid (Green)   |
| YOGURT          | Low-Mid (Green)   |
| GOAT'S MILK     | Mid (Green)       |
| COTTAGE CHEESE  | Mid-High (Yellow) |
| COWS MILK       | High (Yellow)     |

| Miscellaneous | Reaction Level  |
|---------------|-----------------|
| COLA          | Low (Green)     |
| COFFEE        | Low-Mid (Green) |
| BAKER'S YEAST | Low-Mid (Green) |
| HOPS          | High (Red)      |
| TEA           | High (Red)      |
